# Supplementary material
Source: PubMed Central journal article supplement (PMC3865866)
Supplement: NIHMS522889-supplement-table_S1.pdf [file NIHMS522889-supplement-table_S1.pdf]

Table S1

| FBXL2 IP    |              |            |                          |                                |
|-------------|--------------|------------|--------------------------|--------------------------------|
| Acession #  | Protein      | dNSAF(Avg) | Unique Peptides (Merged) | Total Spectral counts (Merged) |
| NP_036289.2 | FBXL2        | 5.28E-02   | 30                       | 3204                           |
| NP_733779.1 | SKP1         | 8.58E-02   | 27                       | 2052                           |
| NP_003583.2 | CUL1         | 1.03E-03   | 25                       | 117                            |
| NP_005018.1 | p85 $\beta$  | 1.28E-04   | 8                        | 12                             |
| NP_852664.1 | p85 $\alpha$ | 1.31E-04   | 7                        | 14                             |
| NP_542414.1 | PTPL1        | 1.36E-05   | 4                        | 5                              |
| NP_001752.2 | FBX01        | 0          | 0                        | 0                              |
| NP_055526.2 | CP110        | 0          | 0                        | 0                              |

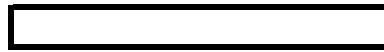

| FBX01          |          |                |
|----------------|----------|----------------|
| Times Detected | dNSAF    | Times Detected |
| 2/2            | 0        | 0/2            |
| 2/2            | 3.11E-01 | 2/2            |
| 2/2            | 7.25E-03 | 2/2            |
| 2/2            | 0        | 0/2            |
| 2/2            | 0        | 0/2            |
| 2/2            | 0        | 0/2            |
| 0/2            | 1.93E-01 | 2/2            |
| 0/2            | 1.08E-04 | 1/2            |
